# Psychiatric Services

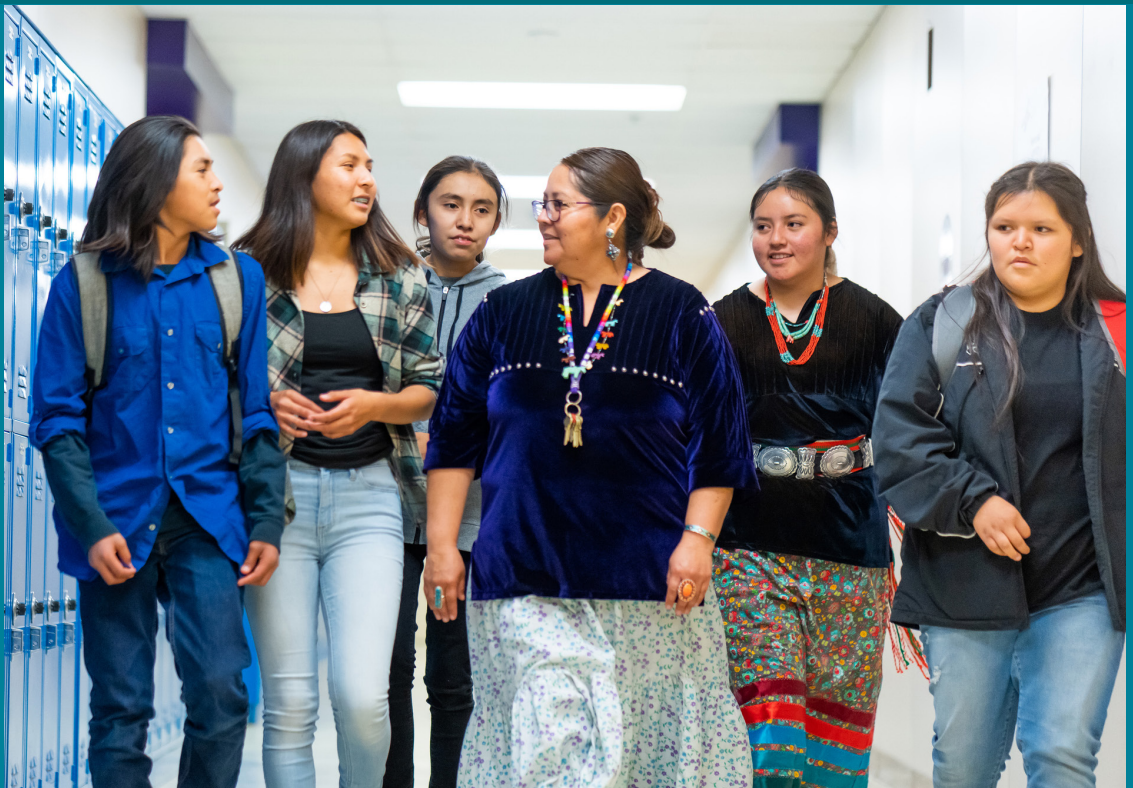

Review: Mental health help seeking among Indigenous populations

Adding cognitive remediation to employment support services

Staff perspectives on population-based suicide risk screening and care coordination

Personal Account: We have all been through a lot
